# Supplementary material
Source: ML conference proceedings conference paper supplement (https://openreview.net/forum?id=9OqezkNxnX)
Supplement: supplementary_material [file attachment]

## A Appendix to Section 3

We first show that a Nash equilibrium exists when agent payoff functions are *separable*, i.e., for every agent  $i$  there are functions  $g_i : S_i \rightarrow \mathbb{R}_{\geq 0}$  and  $h_i : \times_{j \neq i} S_j \rightarrow \mathbb{R}_{\geq 0}$  s.t. for all  $\mathbf{s} \in \mathcal{S}$ ,  $a_i(\mathbf{s}) = g_i(s_i) + h_i(\mathbf{s}_{-i})$ .

**Theorem A.1.** *In any federated learning problem where agent payoff functions are separable, a Nash equilibrium exists.*

*Proof.* When the payoff function of an agent  $i$  is separable, the best response to any contribution vector  $\mathbf{s}_{-i}$  is independent of  $\mathbf{s}_{-i}$ :

$$\begin{aligned} f_i(\mathbf{s}_{-i}) &= \arg \max_{x \in S_i} a_i(x, \mathbf{s}_{-i}) - c_i(x) = \arg \max_{x \in S_i} g_i(x) + h_i(\mathbf{s}_{-i}) - c_i(x) \\ &= \arg \max_{x \in S_i} g_i(x) - c_i(x). \quad (\text{since } h_i(\mathbf{s}_{-i}) \text{ is independent of } x) \end{aligned}$$

Let  $F_i := \arg \max_{x \in S_i} g_i(x) - c_i(x)$ . Clearly  $F_i \neq \emptyset$  since  $S_i \neq \emptyset$ . Then any  $\mathbf{s} \in \times_i F_i$  satisfies  $\mathbf{s} \in f(\mathbf{s})$  by definition. By Proposition 1 any such sample vector is a Nash equilibrium.  $\square$

Next, we present a negative result showing that there are federated learning settings where a Nash equilibrium is not guaranteed to exist.

**Theorem A.2.** *There exists a federated learning problem in which a Nash equilibrium does not exist. Moreover, the instance has three agents with continuous, non-decreasing, non-concave payoff functions and linear cost functions.*

*Proof.* Let  $\varepsilon \in (0, \frac{1}{16})$ . Let  $e : [0, 1] \rightarrow [0, 1]$  be a function given by:

$$e(x) = \begin{cases} 0, & \text{if } 0 \leq x \leq \frac{1}{2} - \varepsilon, \\ \frac{1}{2} + \frac{1}{2\varepsilon}(x - \frac{1}{2}), & \text{if } \frac{1}{2} - \varepsilon \leq x \leq \frac{1}{2} + \varepsilon, \\ 1, & \text{if } \frac{1}{2} + \varepsilon \leq x \leq 1. \end{cases} \quad (8)$$

Essentially the function  $e$  is a continuous, piece-wise linear function connecting  $(0, 0)$ ,  $(\frac{1}{2} - \varepsilon, 0)$ ,  $(\frac{1}{2} + \varepsilon, 1)$  and  $(1, 1)$ .

Now consider the following federated learning instance with  $n = 3$  agents, where  $S_1 = S_2 = S_3 = [0, 1]$ . The payoff functions are given by:

$$\begin{aligned} a_1(\mathbf{s}) &= e(s_1) + e(s_3) - e(s_1) \cdot e(s_3) \\ a_2(\mathbf{s}) &= e(s_2) + e(s_1) - e(s_2) \cdot e(s_1) \\ a_3(\mathbf{s}) &= e(s_3) + e(s_2) - e(s_3) \cdot e(s_2), \end{aligned} \quad (9)$$

and the cost functions are  $c_i(s_i) = \frac{1}{4}s_i$  for all  $i \in [3]$ . Notice that the payoff functions are increasing in  $s_j$  for every  $j \in [3]$  and are continuous since  $e$  is continuous.

We now show that this instance does not admit a Nash equilibrium. Let us first evaluate the best response set  $f_1(s_2, s_3)$ . Note that  $u_1(\mathbf{s}) = e(s_1) \cdot (1 - e(s_3)) + e(s_3) - \frac{1}{4}s_1$ . Since  $u_1(\mathbf{s})$  is independent of  $s_2$ ,  $f_1(s_2, s_3)$  only depends on  $s_3$ .

- Case 1.  $s_3 \leq \frac{1}{2} - \varepsilon$ . Then  $u_1(\mathbf{s}) = e(s_1) - \frac{1}{4}s_1$ , which is maximized at  $s_1 = \frac{1}{2} + \varepsilon$  and results in a utility of  $\frac{7}{8} - \frac{\varepsilon}{4}$ .
- Case 2.  $s_3 \geq \frac{1}{2} + \varepsilon$ . Then  $u_1(\mathbf{s}) = 1 - \frac{1}{4}s_1$ , which is maximized at  $s_1 = 0$  and results in a utility of 1.
- Case 3.  $\frac{1}{2} - \varepsilon \leq s_3 \leq \frac{1}{2} + \varepsilon$ . We consider the intervals in which the best response  $s_1$  to such an  $s_3$  can lie:
  - $s_1 \leq \frac{1}{2} - \varepsilon$ . In this range,  $u_1(\mathbf{s}) = e(s_3) - \frac{1}{4}s_1$ , which is maximized at  $s_1 = 0$  and results in a utility of  $e(s_3)$ .

- 464 –  $s_1 \geq \frac{1}{2} + \varepsilon$ . In this range,  $u_1(s) = 1 - \frac{1}{4}s_1$ , which is maximized at  $s_1 = \frac{1}{2} + \varepsilon$  and results in  
 465 a utility of  $\frac{7}{8} - \frac{\varepsilon}{4}$ .  
 466 –  $\frac{1}{2} - \varepsilon \leq s_1 \leq \frac{1}{2} + \varepsilon$ . In this range, using the definition of  $e(s_1)$  (eq. 8) we obtain:

$$u_1(s) = \left( \frac{1 - e(s_3)}{2\varepsilon} - \frac{1}{4} \right) \cdot s_1 + (1 - e(s_3)) \cdot \left( \frac{1}{2} - \frac{1}{4\varepsilon} \right) + e(s_3).$$

467 Thus  $u_1(s)$  is a linear function in  $s_1$  with slope  $\frac{1 - e(s_3)}{2\varepsilon} - \frac{1}{4}$ . If the slope is positive, then the  
 468 best response in the current interval is  $s_1 = \frac{1}{2} + \varepsilon$ , and gives a utility of  $\frac{7}{8} - \frac{\varepsilon}{4}$ . If the slope  
 469 is negative, then  $s_1 = \frac{1}{2} - \varepsilon$  is the best response in the current interval and gives a utility of  
 470  $e(s_3) - \frac{1}{4}(\frac{1}{2} - \varepsilon)$ . However  $s_1 = 0$  gives a utility of  $e(s_3)$  implying that  $s_1 = \frac{1}{2} - \varepsilon$  cannot  
 471 be a best response. Finally if the slope is zero, then it must mean that  $e(s_3) = 1 - \frac{\varepsilon}{2}$ , and the  
 472 utility is  $\frac{\varepsilon}{2}(\frac{1}{2} - \frac{1}{4\varepsilon}) + 1 - \frac{\varepsilon}{2} = \frac{7}{8} - \frac{\varepsilon}{4}$ . However responding with  $s_1 = 0$  gives a utility of  
 473  $e(s_3) = 1 - \frac{\varepsilon}{2}$ , which exceeds  $\frac{7}{8} - \frac{\varepsilon}{4}$ , since  $\varepsilon < \frac{1}{16}$ . Thus, the best response does not lie in  
 474  $(\frac{1}{2} - \varepsilon, \frac{1}{2} + \varepsilon)$  and  $s_1 = 0$  is the overall best response.

475 The above discussion shows that the best response  $f_1(s_2, s_3) \subseteq \{0, \frac{1}{2} + \varepsilon\}$ . By symmetry, the same  
 476 holds for  $f_2$  and  $f_3$ . Suppose there exists a Nash equilibrium  $s^* = (s_1^*, s_2^*, s_3^*)$ . By Proposition 1,  
 477  $s^* \in f(s^*)$ . Since the above discussion implies  $s_3^* \in \{0, \frac{1}{2} + \varepsilon\}$ , we consider two cases:

- 478 • Suppose  $s_3^* = 0$ . Then

$$\begin{aligned} s_3^* = 0 &\implies s_1^* = \frac{1}{2} + \varepsilon && \text{(Case 1 for agent 1)} \\ &\implies s_2^* = 0 && \text{(Case 2 for agent 2)} \\ &\implies s_3^* = \frac{1}{2} + \varepsilon, && \text{(Case 1 for agent 3)} \end{aligned}$$

479 which is a contradiction.

- 480 • Suppose  $s_3^* = \frac{1}{2} + \varepsilon$ . Then

$$\begin{aligned} s_3^* = \frac{1}{2} + \varepsilon &\implies s_1^* = 0 && \text{(Case 2 for agent 1)} \\ &\implies s_2^* = \frac{1}{2} + \varepsilon && \text{(Case 1 for agent 2)} \\ &\implies s_3^* = 0, && \text{(Case 2 for agent 3)} \end{aligned}$$

481 which is also a contradiction.

482 This shows that there is no  $s^*$  such that  $s^* \in f(s^*)$ , implying that the above instance does not admit  
 483 a Nash equilibrium.  $\square$

484 We now prove the fast convergence of best response dynamics.

485 **Theorem 3.2.** Let  $G(s)$  be the Jacobian of  $u : \mathcal{S} \rightarrow \mathbb{R}^n$ , i.e.,  $G(s)_{ij} = \frac{\partial^2 u_i(s)}{\partial s_j \partial s_i}$ . Assuming agent  
 486 utility functions  $u_i$  satisfy

- 487 1. Strong concavity:  $(G + \lambda \cdot I_{n \times n})$  is negative semi-definite,  
 488 2. Bounded derivatives:  $|G_{ij}| \leq L$ ,

489 for constants  $\lambda, L > 0$ , the best response dynamics (4) with step size  $\delta^t = \frac{\lambda}{n^2 L^2}$  converges to an  
 490 approximate Nash equilibrium  $s^T$  where  $\|g(s^T, \mu^0)\|_2 < \varepsilon$  in  $T$  iterations, where

$$T = \frac{2n^2 L^2}{\lambda^2} \log \left( \frac{\|g(s^0, \mu^0)\|_2}{\varepsilon} \right).$$

491 *Proof.* Observe that  $\mu^t$  is chosen s.t.  $\|g(s^t, \mu^t)\|_2$  is minimized among all  $\mu$  s.t. the updated sample  
 492 vector  $s^{t+1}$  remains in  $\mathcal{S}$ . Thus:

$$\|g(s^{t+1}, \mu^{t+1})\|_2 \leq \|g(s^{t+1}, \mu^t)\|_2 \quad (10)$$

493 Using Taylor's expansion, we have:

$$g(s^{t+1}, \mu^t) = g(s^t, \mu^t) + H(s', \mu^t) \cdot (s^{t+1} - s^t),$$

494 where  $H_{ij}(s', \mu^t) = \frac{\partial g(s', \mu^t)}{\partial s_j}$ , and  $s' = s^t + \alpha(s^{t+1} - s^t)$  for some  $\alpha \in [0, 1]$ .

495 By definition,  $g(s^t, \mu^t)_i = \frac{\partial u_i(s^t)}{\partial s_i} + \mu_i^t$ . Thus  $H_{ij}(s', \mu^t) = \frac{\partial^2 u_i(s^t)}{\partial s_j \partial s_i} = G_{ij}(s')$ , hence  $H(s', \mu^t) =$   
 496  $G(s')$ . The BR dynamics update rule (4) implies  $s^{t+1} - s^t = \delta^t \cdot g(s^t, \mu^t)$ . We therefore have  
 497  $g(s^{t+1}, \mu^t) = (I_{n \times n} + \delta^t \cdot G(s')) \cdot g(s^t, \mu^t)$ . Taking the  $L^2$  norm, we get:

$$\|g(s^{t+1}, \mu^t)\|_2^2 = \|g(s^t, \mu^t)\|_2^2 + \delta_t^2 \cdot \|G(s')g(s^t, \mu^t)\|_2^2 + 2\delta_t g(s^t, \mu^t)^T G(s')g(s^t, \mu^t), \quad (11)$$

498 By the strong concavity assumption, for a constant  $\lambda > 0$ ,  $G + \lambda \cdot I_{n \times n}$  is negative semi-definite,  
 499 i.e.,  $v^T(G + \lambda \cdot I_{n \times n})v \leq 0$  for any  $v \in \mathbb{R}^n$ . With  $v = g(s^t, \mu^t)$ , we have:

$$g(s^t, \mu^t)^T G(s')g(s^t, \mu^t) \leq -\lambda \cdot \|g(s^t, \mu^t)\|_2^2. \quad (12)$$

500 Next we use the fact that the  $L^2$  norm  $\|A\|_2$  of an  $n \times n$  matrix  $A$  is bounded by its Frobenius norm  
 501  $\|A\|_F$ :

$$\|A\|_2 := \sup_{x \neq 0} \frac{\|Ax\|_2}{\|x\|_2} \leq \|A\|_F := \sqrt{\sum_i \sum_j |A_{ij}|^2}$$

502 By the bounded derivatives assumption, we have  $|G(s')_{ij}| \leq L$ , which implies that  $\|G(s')\|_F =$   
 503  $\sqrt{\sum_i \sum_j L^2} = nL$ . This gives:

$$\|G(s')g(s^t, \mu^t)\|_2 \leq nL\|g(s^t, \mu^t)\|_2. \quad (13)$$

504 Using (12) and (13) in (11), we get:

$$\|g(s^{t+1}, \mu^t)\|_2^2 = (1 + \delta_t^2 \cdot n^2 L^2 - 2\delta_t \lambda) \cdot \|g(s^t, \mu^t)\|_2^2,$$

505 Since  $\delta^t = \frac{\lambda}{n^2 L^2}$ , the above equation together with (10) gives:

$$\|g(s^{t+1}, \mu^{t+1})\|_2^2 \leq \left(1 - \frac{\lambda^2}{n^2 L^2}\right) \cdot \|g(s^t, \mu^t)\|_2^2.$$

506 Using  $(1 - x)^r \leq e^{-xr}$  repeatedly we obtain that:

$$\|g(s^t, \mu^t)\|_2 \leq e^{-\frac{\lambda^2}{2n^2 L^2} \cdot t} \cdot \|g(s^0, \mu^0)\|_2.$$

507 Thus if we want the error  $\|g(s^t, \mu^t)\|_2 \leq \varepsilon$ ,  $T = \frac{2n^2 L^2}{\lambda^2} \log\left(\frac{\|g(s^0, \mu^0)\|_2}{\varepsilon}\right)$  iterations suffice, as  
 508 claimed.  $\square$

## 509 B Appendix to Section 4

510 **Lemma 1.** The equation  $C\beta^2 - (An(n-2) + C)\beta + A(n-1)^2 = 0$  of (6) has a real root  $\beta^*$   
 511 where  $0 \leq \beta^* \leq 1 - 1/n$ .

512 *Proof.* Using the quadratic formula, we see that  $\beta^*$  given by:

$$\beta^* = \frac{An(n-2) + C - \sqrt{(An(n-2) + C)^2 - 4AC(n-1)^2}}{2C} \quad (14)$$

513 We first argue  $\beta^*$  is real, by showing  $(An(n-2) + C)^2 - 4AC(n-1)^2 \geq 0$ . This is equivalent  
 514 to showing  $q(y) := (y + n(n-2))^2 - 4(n-1)^2 y \geq 0$ , where  $y = C/A$ . Expanding  $q$ , we have  
 515  $q(y) = y^2 - 2(n^2 - 2n + 2)y + n^2(n-2)^2$ . The roots of  $q$  are:

$$y_1, y_2 = \frac{2(n^2 - 2n + 2) \pm \sqrt{4(n^2 - 2n + 2)^2 - 4n^2(n-2)^2}}{2} = (n^2 - 2n + 2) \pm 2(n-1),$$

516 i.e.,  $y_1 = (n-2)^2$  and  $y_2 = n^2$ . Since  $q(y)$  has a positive leading coefficient, we have that  $q(y) \geq 0$   
 517 for all  $y \geq y_2 = n^2$ . Thus it remains to show that  $y = C/A \geq n^2$ . To see this, we use the AM-HM  
 518 inequality:

$$\frac{C}{n} = \frac{c_1 + \dots + c_n}{n} \geq \frac{n}{\frac{1}{c_1} + \dots + \frac{1}{c_n}} = \frac{n}{A}, \quad (15)$$

519 implying  $C/A \geq n^2$  as desired. This shows that the root  $\beta^*$  of equation (6) is real, hence well-defined.

520 We now show  $0 \leq \beta^* \leq 1 - 1/n$ . From (14), we see:

$$\begin{aligned} \beta^* &= \frac{An(n-2) + C - \sqrt{(An(n-2) + C)^2 - 4AC(n-1)^2}}{2C} \\ &\geq \frac{An(n-2) + C - \sqrt{(An(n-2) + C)^2}}{2C} = 0 \end{aligned}$$

521 Further, from (14) we also have:

$$\begin{aligned} \beta^* &= \frac{An(n-2) + C - \sqrt{(An(n-2) + C)^2 - 4AC(n-1)^2}}{2C} \\ &\leq \frac{An(n-2) + C}{2C} = \frac{Cn(n-2)/n^2 + C}{2C} = 1 - \frac{1}{n}, \end{aligned}$$

522 where we used  $A/C \leq 1/n^2$  (15) in the last inequality. This concludes the proof of Lemma 1.  $\square$

523 **Theorem 4.1.** For each  $\beta \in [0, 1]$ , the mechanism  $\mathcal{M}_\beta$  admits a Nash equilibrium. For  $\beta = \beta^*$   
 524 (Definition 2), the NE of  $\mathcal{M}_{\beta^*}$  also maximizes the  $p$ -mean welfare for any  $p \leq 1$ . Additionally, any  
 525 NE  $\mathbf{s}^*$  with  $\mathbf{s}^* > 0$  maximizes the  $p$ -mean welfare.

526 *Proof.* When  $0 \leq \beta \leq 1$ , the program (5) is a convex program for general convex cost functions.  
 527 Since  $u_i(\cdot)$  is concave, a proof similar to the proof of Theorem 3.1 shows the existence of a Nash  
 528 equilibrium.

529 We now show the welfare-maximizing property. For simplicity, we only consider feasible strategies  
 530 where each agent participates in the mechanism, i.e.,  $s_i > 0$ . Let  $\rho_i$  and  $\lambda_i$  as the dual variables to the  
 531 first and second constraints respectively for each  $i$ , and let  $S = \|\mathbf{s}\|_1$ . Writing the KKT conditions  
 532 and eliminating all  $\rho_i$ , we get that a NE  $(\mathbf{b}^*, \mathbf{s}^*)$  together with dual variables  $\lambda^*$  satisfies:

$$\forall i : \frac{\partial u_i(b_i^*, S^*)}{\partial S} = (1 - \beta) \cdot c_i \cdot \left( \frac{\partial u_i(b_i^*, S^*)}{\partial b_i} + \lambda_i^* \right) \quad (\text{from stationarity conditions}) \quad (16)$$

$$\forall i : \lambda_i^* \geq 0 \quad (\text{dual feasibility}) \quad (17)$$

$$\forall i : \lambda_i^* \cdot b_i = 0 \quad (\text{complimentary slackness}) \quad (18)$$

533 Now we turn to the  $p$ -mean welfare maximizing solution which is an optimal solution to the following  
 534 program.

$$\begin{aligned} \max \quad & W_p(\mathbf{b}, \mathbf{s}) := \left( \sum_i u_i(b_i, \|\mathbf{s}\|_1)^p \right)^{1/p} \\ \text{s.t.} \quad & \forall i : b_i + (1 - \beta)c_i(s_i) + \frac{\beta}{n-1} \sum_{j \neq i} c_j(s_j) = B_i \\ & \forall i : b_i \geq 0 \end{aligned} \quad (19)$$

535 The following lemma establishes that (19) is a convex program. For ease of readability we defer its  
 536 proof to B.1.

537 **Lemma 2.** For  $\beta \in [0, 1]$  and  $p \leq 1$ , the program (19) is convex.

538 We can now write the KKT conditions of program (19). By letting  $\mu_i$  and  $\gamma_i$  denote the dual variables  
 539 corresponding to the first and second constraints respectively for each  $i$  and  $S = \|\mathbf{s}\|_1$ , the KKT  
 540 conditions (considering only solutions with  $s_i > 0$ ) are:

$$\forall i : \left( \sum_j u_j^p \right)^{1/p-1} \sum_k u_k^{p-1} \frac{\partial u_k}{\partial S} = c_i \cdot [\mu_i(1 - \beta) + \frac{\beta}{n-1} \sum_{k \neq i} \mu_k] \quad (\text{stationarity}) \quad (20)$$

$$\forall i : \left( \sum_j u_j^p \right)^{1/p-1} u_i^{p-1} \frac{\partial u_i}{\partial b_i} = \mu_i - \gamma_i \quad (\text{stationarity}) \quad (21)$$

$$\forall i : \gamma_i \geq 0 \quad (\text{dual feasibility}) \quad (22)$$

$$\forall i : \gamma_i \cdot b_i = 0 \quad (\text{complimentary slackness}) \quad (23)$$

541 Since KKT conditions are sufficient for optimality, to prove Theorem 4.1 it suffices to show that for  
542 an NE  $(\mathbf{b}^*, \mathbf{s}^*)$ , there exist dual variables  $\boldsymbol{\mu}^*$  and  $\boldsymbol{\gamma}^*$  which satisfy (20)-(23) for  $\beta = \beta^*$ .

543 Let  $\alpha := (\sum_j u_j (b_j^*, \mathbf{s}^*)^p)^{1/p-1} \sum_k u_k (b_k^*, \mathbf{s}^*)^{p-1} \frac{\partial u_k(b_k^*, \mathbf{s}^*)}{\partial S}$ , i.e., the common value of the equality  
544 (20) at the NE  $(\mathbf{b}^*, \mathbf{s}^*)$ . The equation (20) then becomes  $\alpha \cdot c_i^{-1} = \mu_i(1 - \beta) + \frac{\beta}{n-1} \sum_{k \neq i} \mu_k$ .  
545 Summing these over all  $i$  and letting  $T = \sum_j \mu_j$ , we obtain:

$$\alpha \cdot \left( \sum_i c_i^{-1} \right) = \sum_i [\mu_i(1 - \beta) + \frac{\beta}{n-1} \sum_{k \neq i} \mu_k] = T.$$

546 Putting this back in (20), we obtain the following expression for  $\mu_i^*$ , which can be computed from the  
547 NE  $(\mathbf{b}^*, \mathbf{s}^*)$  with  $T = \alpha \cdot (\sum_i c_i^{-1})$ :

$$\mu_i^* = \frac{\frac{T c_i^{-1}}{\sum_i c_i^{-1}} - \frac{\beta T}{n-1}}{1 - \frac{\beta n}{n-1}}. \quad (24)$$

548 Recall that the NE  $(\mathbf{b}^*, \mathbf{s}^*)$  satisfies (16)-(18) for some dual variables  $\lambda^*$ . We define  $\gamma_i^*$  as follows:

$$\gamma_i^* = \mu_i^* \cdot \left( \frac{\lambda_i^*}{\lambda_i^* + \frac{\partial u_i(b_i^*, \mathbf{s}^*)}{\partial b_i}} \right) \quad (25)$$

549 The next lemma proves Theorem 4.1.

550 **Lemma 3.** A NE  $(\mathbf{b}^*, \mathbf{s}^*)$  with  $\boldsymbol{\mu}^*$  and  $\boldsymbol{\gamma}^*$  defined by (24) and (25) satisfy the KKT conditions  
551 (20)-(23) of program (19).

552 *Proof.* First observe that at the NE,  $(1 - \beta)c_i \cdot \left( \frac{\partial u_i(b_i^*, \mathbf{s}^*)}{\partial b_i} + \lambda_i^* \right) = \frac{\partial u_i(b_i^*, \mathbf{s}^*)}{\partial S} > 0$  by assumption.  
553 Since  $\beta \in (0, 1)$  and  $c_i > 0$ , we have  $\frac{\partial u_i(b_i^*, \mathbf{s}^*)}{\partial b_i} + \lambda_i^* > 0$ . Together with  $\lambda_i^* \geq 0$  (17), this shows  
554  $\gamma_i^* \geq 0$  thus satisfying dual feasibility (22).

555 Next we show complimentary slackness (23) holds. For any  $i$ ,  $\lambda_i^* \cdot b_i = 0$  due to (18). Then by the  
556 definition of  $\gamma_i^*$ , we have  $\gamma_i^* \cdot b_i = 0$  for all  $i$ .

557 Finally, we show that equations (20) and (21) are satisfied for a specific choice of  $\beta = \beta^*$ . Together,  
558 (20) and (21) imply that an optimal solution to program (19) satisfies:

$$\forall i : \sum_k (\mu_k - \gamma_k) \cdot \frac{\partial u_k / \partial S}{\partial u_k / \partial b_k} = c_i \cdot [\mu_i(1 - \beta) + \frac{\beta}{n-1} \sum_{k \neq i} \mu_k] \quad (26)$$

559 The choice of  $\gamma_i^*$  from equation 25 implies that  $\mu_i^* - \gamma_i^* = \mu_i^* \cdot \left( \frac{\partial u_i(b_i^*, \mathbf{s}^*) / \partial b_i}{\partial u_i(b_i^*, \mathbf{s}^*) / \partial b_i + \lambda_i^*} \right)$ . Moreover at the  
560 NE, equation (16) implies that:

$$\begin{aligned} (\mu_i^* - \gamma_i^*) \cdot \frac{\partial u_i(b_i^*, \mathbf{s}^*) / \partial S}{\partial u_i(b_i^*, \mathbf{s}^*) / \partial b_i} &= \mu_i^* \cdot \left( \frac{\partial u_i(b_i^*, \mathbf{s}^*) / \partial b_i}{\partial u_i(b_i^*, \mathbf{s}^*) / \partial b_i + \lambda_i^*} \right) \cdot (1 - \beta)c_i \cdot \left( 1 + \frac{\lambda_i^*}{\partial u_i(b_i^*, \mathbf{s}^*) / \partial b_i} \right) \\ &= \mu_i^* \cdot (1 - \beta)c_i. \end{aligned}$$

561 Using the above in (26), it only remains to be argued that  $\boldsymbol{\mu}^*$ ,  $\mathbf{b}^*$  and  $\mathbf{s}^*$  satisfy:

$$\forall i : (1 - \beta) \cdot \sum_k \mu_k^* \cdot c_k = c_i \cdot [\mu_i^*(1 - \beta) + \frac{\beta}{n-1} \sum_{k \neq i} \mu_k^*] = \alpha,$$

for  $\beta = \beta^*$ . By plugging in the value of  $\mu_i^*$  from (24) and using  $\alpha = T \cdot (\sum_k c_k^{-1})^{-1}$ , we get:

$$(1 - \beta) \cdot \sum_k \left\{ \frac{T c_k^{-1} (\sum_i c_i^{-1})^{-1} - \frac{\beta T}{n-1}}{1 - \frac{\beta n}{n-1}} \right\} \cdot c_k = T \cdot (\sum_k c_k^{-1})^{-1}.$$

Let us define  $A := (\sum_i c_i^{-1})^{-1}$  and  $C := \sum_i c_i$ . Manipulating the above expression, the above equation then becomes:

$$C\beta^2 - (An(n-2) + C)\beta + A(n-1)^2 = 0,$$

which is true for  $\beta = \beta^*$  since it is exactly the definition of  $\beta^*$  (Definition 2).

Thus for  $\beta = \beta^*$ , the NE  $(\mathbf{b}^*, \mathbf{s}^*)$  with dual variables  $\boldsymbol{\mu}$  and  $\boldsymbol{\gamma}$  as defined in (24) and (25) respectively satisfy the KKT conditions of program (19).  $\square$

$\square$

## B.1 Proof of Lemma 2

**Lemma 2.** For  $\beta \in [0, 1]$  and  $p \leq 1$ , the program (19) is convex.

*Proof.* For  $\beta \in [0, 1]$  the constraints of program 19 are convex since  $c_i(\cdot)$  are convex functions. It remains to be shown that the objective  $W_p(\mathbf{b}, \mathbf{s}) := (\sum_i u_i(b_i, \|\mathbf{s}\|_1)^p)^{1/p}$  to be maximized is concave.

We use the following standard fact about the concavity of composition of functions (see e.g. Boyd and Vandenberghe [2004], Page 86).

**Proposition 2.** Let  $h : \mathbb{R}^n \rightarrow \mathbb{R}$  and  $g_i : \mathbb{R}^k \rightarrow \mathbb{R}$  and let  $f : \mathbb{R}^n \rightarrow \mathbb{R}$  be given by  $f(x) = h(g(x)) = h(g_1(x), \dots, g_n(x))$ . Then  $f$  is concave if  $h$  is concave,  $h$  is non-decreasing in each argument and  $g_i$  are concave.

Note that  $W_p(\mathbf{b}, \mathbf{s}) = h(g(\mathbf{b}, \mathbf{s}))$ , where  $h(x_1, \dots, x_n) = (\sum_i x_i^p)^{1/p}$  and  $g_i(\mathbf{b}, \mathbf{s}) = u_i(\mathbf{b}, \mathbf{s})$ .

We now observe that:

- $h$  is non-decreasing in each argument. This is because:

$$\frac{\partial h}{\partial x_i} = h^{1-p} x_i^{p-1} \geq 0.$$

- $h$  is concave. Using the above, we can compute the Hessian  $H$  given by:

$$H_{ij} = \frac{\partial^2 h}{\partial x_j \partial x_i} = \begin{cases} (1-p)h^{1-2p}(x_i x_j)^{p-1} & (\text{if } i \neq j) \\ (1-p)h^{1-2p}x_i^{p-2} \cdot (x_i^p - h^p) & (\text{if } i = j) \end{cases}$$

Thus for any  $v \in \mathbb{R}^n$ , we have:

$$\begin{aligned} v^T H v &= \sum_i \sum_j v_i H_{ij} v_j \\ &= (1-p)h^{1-2p} \cdot \left( \sum_i v_i \sum_{j \neq i} H_{ij} v_j + \sum_i v_i^2 H_{ii} \right) \\ &= (1-p)h^{1-2p} \cdot \left( \sum_i v_i x_i^{p-1} \cdot \left( \left( \sum_j v_j x_j^{p-1} \right) - v_i x_i^{p-1} \right) + \sum_i v_i^2 (x_i^{2p-2} - h^p x_i^{p-2}) \right) \\ &= (1-p)h^{1-2p} \cdot \left( \left( \sum_i v_i x_i^{p-1} \right)^2 - \sum_i (v_i x_i^{p-1})^2 + \sum_i v_i^2 x_i^{2p-2} - \sum_i v_i^2 h^p x_i^{p-2} \right) \\ &= (1-p)h^{1-2p} \cdot \left( \left( \sum_i v_i x_i^{p-1} \right)^2 - \left( \sum_i v_i^2 x_i^{p-2} \right) \left( \sum_j x_j^p \right) \right) \\ &\leq 0, \end{aligned}$$

---

**Algorithm 1** FedBR-BG

---

1: **Input:** Number of iterations in game  $H$ , number of iterations of gradient descent  $T$ , learning rate  $\alpha$ , step size  $\delta$ , data increasing interval  $\Delta s$   
2: **Output:** Model weights  $\theta^T$ , individual contributions  $s$   
3: **for**  $h = 1, 2, \dots, H$  **do**  
4:   Server sends  $\theta^t$  to agents;  
5:   **for**  $t = 0, 1, \dots, T - 1$  **do**  
6:     **for**  $i \in [n]$  **in parallel do**  
7:        $i$  computes  $\nabla_{\theta^t} \mathcal{L}_i(\theta^t)$  on its local dataset  $\mathcal{D}_i$ ;  
8:        $i$  sends  $\nabla_{\theta^t} \mathcal{L}_i(\theta^t)$  to server;  
9:     **end for**  
10:   Server aggregates the gradients following

$$\nabla_{\theta^t} \mathcal{L}(\theta^t) \leftarrow \frac{1}{\sum_{i \in [n]} |\mathcal{D}_i|} \sum_{i \in [n]} |\mathcal{D}_i| \cdot \nabla_{\theta^t} \mathcal{L}_i(\theta^t);$$

11:   Server updates  $\theta^{t+1}$  following

$$\theta^{t+1} \leftarrow \theta^t - \alpha \cdot \nabla_{\theta^t} \mathcal{L}(\theta^t);$$

12:   **end for**  
13:   **for**  $i \in [n]$  **in parallel do**  
14:      $\frac{\partial u_i}{\partial s_i} \leftarrow \frac{a(\sum_i s_i + \Delta s) - a(\sum_i s_i)}{\Delta s} - (1 - \beta)c_i$   
15:     **if**  $(s_i = 0 \text{ and } \frac{\partial u_i}{\partial s_i} < 0)$  **or**  $(s_i = \tau_i \text{ and } \frac{\partial u_i}{\partial s_i} > 0)$  **then**  
16:        $s_i^{h+1} \leftarrow s_i^h$ ;  
17:     **else**  
18:        $s_i^{h+1} = s_i^h + \delta \cdot \frac{\partial u_i}{\partial s_i}$ ;  
19:     **end if**  
20:   **end for**  
21: **end for**

---

584   since  $p \leq 1, h \geq 0$ , and by the Cauchy-Schwarz inequality  $(\sum_i a_i \cdot b_i)^2 \leq (\sum_i a_i^2) \cdot (\sum_i b_i^2)$  with  
585    $a_i = v_i x_i^{p/2-1}$  and  $b_i = x_i^{p/2-1}$ . Thus  $H$  is negative semi-definite and hence  $h$  is concave.

586   • For each  $i$ ,  $g_i(\mathbf{b}, \mathbf{s}) = u_i(\mathbf{b}, \mathbf{s})$  is concave.

587 Using Proposition 2 and the fact that  $W_p(\mathbf{b}, \mathbf{s}) = h(g(\mathbf{b}, \mathbf{s}))$  we conclude that  $W_p(\mathbf{b}, \mathbf{s})$  is concave.  
588 □

## 589 C Distributed Algorithms

590 In this section, we present the distributed algorithms of our two mechanisms, FedBR and FedBR-BG.

## 591 D Additional Results

592 We present the results of our method on CIFAR-10 in Table 2.

Table 2:  $p$ -mean welfare of our budget-balanced mechanism FedBR-BG and baselines on CIFAR-10. We report the results for different  $p$ . The cost for adding one data sample  $c_i$  is 0.005 for every agent.

| Method   | $p$             |               |               |              |              |
|----------|-----------------|---------------|---------------|--------------|--------------|
|          | 0.2             | 0.4           | 0.6           | 0.8          | 1.0          |
| FedAvg   | 42386.21        | 135.92        | 23.528        | 8.381        | 4.582        |
| FedBR    | 58297.23        | 178.32        | 26.187        | 9.675        | 5.681        |
| FedBR-BG | <b>60385.32</b> | <b>183.23</b> | <b>27.958</b> | <b>9.981</b> | <b>5.891</b> |

---

**Algorithm 2** FedBR

---

**Input:** Number of iterations in game  $H$ , number of iterations of gradient descent  $T$ , learning rate  $\alpha$ , step size  $\delta$ , data increasing interval  $\Delta s$

**Output:** Model weights  $\theta^T$ , individual contributions  $\mathbf{s}$

**for**  $h = 1, 2, \dots, H$  **do**

Server sends  $\theta^t$  to agents;

**for**  $t = 0, 1, \dots, T - 1$  **do**

**for**  $i \in [n]$  **in parallel do**

$i$  computes  $\nabla_{\theta^t} \mathcal{L}_i(\theta^t)$  on its local dataset  $\mathcal{D}_i$ ;

$i$  sends  $\nabla_{\theta^t} \mathcal{L}_i(\theta^t)$  to server;

**end for**

Server aggregates the gradients following

$$\nabla_{\theta^t} \mathcal{L}(\theta^t) \leftarrow \frac{1}{\sum_{i \in [n]} |\mathcal{D}_i|} \sum_{i \in [n]} |\mathcal{D}_i| \cdot \nabla_{\theta^t} \mathcal{L}_i(\theta^t);$$

Server updates  $\theta^{t+1}$  following

$$\theta^{t+1} \leftarrow \theta^t - \alpha \cdot \nabla_{\theta^t} \mathcal{L}(\theta^t);$$

**end for**

**for**  $i \in [n]$  **in parallel do**

$$\frac{\partial u_i}{\partial s_i} \leftarrow \frac{a(\sum_i s_i + \Delta s) - a(\sum_i s_i)}{\Delta s} - c_i$$

**if**  $(s_i = 0 \text{ and } \frac{\partial u_i}{\partial s_i} < 0)$  **or**  $(s_i = \tau_i \text{ and } \frac{\partial u_i}{\partial s_i} > 0)$  **then**

$$s_i^{h+1} \leftarrow s_i^h;$$

**else**

$$s_i^{h+1} = s_i^h + \delta \cdot \frac{\partial u_i}{\partial s_i};$$

**end if**

**end for**

**end for**

---
